# Supplementary material for: Comprehensive Landscape of Immune Infiltration and Aberrant Pathway Activation in Ischemic Stroke
Source: PubMed Central journal article supplement (PMC8818702; doi:10.3389/fimmu.2021.766724), 2022-01-24
Supplement: Table_1.pdf [file Table_1.pdf]

|                   | <b>Control<br/>(N=24)</b> | <b>Stroke<br/>(N=39)</b> | <b>Overall<br/>(N=63)</b> |
|-------------------|---------------------------|--------------------------|---------------------------|
| <b>Gender</b>     |                           |                          |                           |
| Female            | 14 (58.3%)                | 22 (56.4%)               | 36 (57.1%)                |
| Male              | 10 (41.7%)                | 17 (43.6%)               | 27 (42.9%)                |
| <b>Age</b>        |                           |                          |                           |
| Mean (SD)         | 59.9 (9.73)               | 73.1 (14.0)              | 68.0 (14.0)               |
| Median [Min, Max] | 59.5 [40.0, 82.0]         | 77.0 [43.0, 96.0]        | 68.0 [40.0, 96.0]         |
