# Supplementary material for: Comprehensive Landscape of Immune Infiltration and Aberrant Pathway Activation in Ischemic Stroke
Source: PubMed Central journal article supplement (PMC8818702; doi:10.3389/fimmu.2021.766724), 2022-01-24
Supplement: Table_2.pdf [file Table_2.pdf]

| Symbol  | Function             | Reference                          |
|---------|----------------------|------------------------------------|
| MICA    | Antigen presentation | doi: 10.1016/j.immuni.2018.03.023. |
| CD79B   | B cells              | doi: 10.1016/j.cell.2014.12.033.   |
| CD79A   | B cells              | doi: 10.1016/j.cell.2014.12.033.   |
| BACH2   | B cells              | doi: 10.1016/j.cell.2014.12.033.   |
| BTLA    | B cells              | doi: 10.1016/j.cell.2014.12.033.   |
| FCRL3   | B cells              | doi: 10.1016/j.cell.2014.12.033.   |
| BANK1   | B cells              | doi: 10.1016/j.cell.2014.12.033.   |
| BLK     | B cells              | doi: 10.1016/j.cell.2014.12.033.   |
| CD8A    | CD8+ T cells         | doi: 10.1016/j.cell.2014.12.033.   |
| GZMA    | Cytolytic Activity   | doi: 10.1016/j.cell.2014.12.033.   |
| GZMB    | Cytolytic Activity   | doi: 10.1016/j.cell.2014.12.033.   |
| MMP9    | Macrophages          | doi: 10.1016/j.cell.2014.12.033.   |
| CYBB    | Macrophages          | doi: 10.1016/j.cell.2014.12.033.   |
| CLEC5A  | Macrophages          | doi: 10.1016/j.cell.2014.12.033.   |
| LGMN    | Macrophages          | doi: 10.1016/j.cell.2014.12.033.   |
| CXCR3   | pDCs                 | doi: 10.1016/j.cell.2014.12.033.   |
| IRF8    | pDCs                 | doi: 10.1016/j.cell.2014.12.033.   |
| CD2     | Stimulation          | doi: 10.1016/j.cell.2014.12.033.   |
| TNFRSF2 | Stimulation          | doi: 10.1016/j.cell.2014.12.033.   |
| SLAMF1  | Stimulation          | doi: 10.1016/j.cell.2014.12.033.   |
| ICOS    | Stimulation          | doi: 10.1016/j.cell.2014.12.033.   |
| CD40LG  | Stimulation          | doi: 10.1016/j.cell.2014.12.033.   |
| TNFRSF4 | Stimulation          | doi: 10.1016/j.cell.2014.12.033.   |
| CCL5    | Stimulation          | doi: 10.1016/j.immuni.2018.03.023. |
| TNFRSF1 | Stimulation          | doi: 10.1016/j.immuni.2018.03.023. |
| TNF     | Stimulation          | doi: 10.1016/j.immuni.2018.03.023. |
| TNFRSF1 | Stimulation          | doi: 10.1016/j.cell.2014.12.033.   |
| CD40    | Stimulation          | doi: 10.1016/j.cell.2014.12.033.   |
| BTN3A1  | Stimulation          | doi: 10.1016/j.immuni.2018.03.023. |
