# Supplementary material for: Comprehensive Landscape of Immune Infiltration and Aberrant Pathway Activation in Ischemic Stroke
Source: PubMed Central journal article supplement (PMC8818702; doi:10.3389/fimmu.2021.766724), 2022-01-24
Supplement: Table_3.pdf [file Table_3.pdf]

| Gene  | Primers(forward)                       | Primers(reverse)                        |
|-------|----------------------------------------|-----------------------------------------|
| CD8A  | 5'-<br>CACCCATGCCATCTCAACCTC<br>TTC-3' | 5'-<br>GCTCCAACCCTGACTTGCTGTG<br>-3'    |
| GZMA  | 5'-<br>AGGTTGATTGATGTGGGACAG<br>CAG-3' | 5'-<br>GCAGGAGAGAAACGACAACG<br>AGAG-3'  |
| IRF8  | 5'-<br>ACTGCTGGCTGCGTGAATGAA<br>G-3'   | 5'-<br>GTAATCGTCCACAGAAGGCTCC<br>TTG-3' |
| GZMB  | 5'-<br>AGGTGCGGTGGCTTCCTGATA<br>C-3'   | 5'-<br>CTGGGTGCGCTCCTGTTCTTTG<br>-3'    |
| CD79B | 5'-<br>GGGATTCAGCACCTTGGCACA<br>G-3'   | 5'-<br>CAGCAGGAAGATAGGCACGAT<br>GATG-3' |
| CD79A | 5'-<br>TCTTCCTCCTCTTCCTGCTGT<br>CTG-3' | 5'-<br>CGTTGGCGTTGTTGCTGCTATT<br>G-3'   |
| GAPDH | 5'-<br>GGTCGGAGTCAACGGATTTGG<br>TCG-3' | 5'-<br>CCTCCGACGCCTGCTTCACCA<br>C-3'    |
